# Supplementary material for: Conjunctival flora of clinically normal and diseased turtles and tortoises
Source: PubMed Central journal article supplement (PMC4397695; doi:10.1186/s12917-015-0405-x), 2015-04-10
Supplement: 12917_2015_405_MOESM1_ESM.pdf [file 12917_2015_405_MOESM1_ESM.pdf]

Sequences of the amplicons obtained from *Mycoplasma* PCR positive samples and control. The reported sequences were used for BLAST analysis.

| Sample      | Sequence                                                                                                                                                                                                                            | Primer   | Left Clip | Right Clip | Length |
|-------------|-------------------------------------------------------------------------------------------------------------------------------------------------------------------------------------------------------------------------------------|----------|-----------|------------|--------|
| Turtle n. 2 | ATCAAATATATTTTGTGAAATAATTTTGATCCGAGT<br>TGTGTCTATACATGGGTATAGACACTATAAATACCT<br>TAAGAATACATCAAAACAAAAAACATTTTTTTTA<br>AATAGGAAAAAATAGTTACTTATACTTTTAAATA<br>GCAAGAGTTTTTGGTGGATGCAGAGTTTTTGGGGG<br>ATGCAGAGATT                      | F2-sense | 16        | 203        | 187    |
| Turtle n. 4 | ACATCAAATATATTTTGTGAAATAATTTTGATCCG<br>AGTTGTGTCTATACATGGGTATAGACACTATAAATA<br>CCTAAGAATACATCAAAACAAAAAACATTTTTTTT<br>TAAATAGGAAAAAATAGTTACTTATACTTTTAAATA<br>AGCAAGAGTTTTTGGTGGATGCAGAGTTTTTGGTGG<br>ATGCAGAGTTTTTGGTGGATGCAGAGTTT | F2-sense | 14        | 222        | 208    |
| Turtle n. 5 | CAAGTTTAGATCAACCTATAGAATATATCATAACAAT<br>AGACAAACAATAGGTCTTATACTACTATTAAACAA<br>GATAAGAGTTTTTGGTGGATGCA                                                                                                                             | F2-sense | 26        | 119        | 93     |
| Turtle n. 6 | TTATTAATATTTCAAGTTTAGATCAACCTATAGAAT<br>ATATCATAACAATAGACAAACAATAGGTCTTATACT<br>ACTATTAAACAAGATAAGAGTTTTTGGTGGATGCC<br>GTAA                                                                                                         | F2-sense | 10        | 119        | 109    |

|                                 |                                                                                                                                                                                            |          |    |     |     |
|---------------------------------|--------------------------------------------------------------------------------------------------------------------------------------------------------------------------------------------|----------|----|-----|-----|
| Tortoise n. 11                  | TACGACATCAAATATATTTTGTGAAATAATTTTGAT<br>CCGAGTTAAGACCAATTATTGGTCTTTATAAATACC<br>TTAAGAATACATCAAAAAACATTTTTTTTAATAGGA<br>AAAAATAGTTACTTAAACTTTTAAATAAGCAAGAG<br>TTTTTGGTGGATGATGA           | F2-sense | 10 | 169 | 159 |
| Tortoise n. 15                  | ACGACATCAAATATATTTTGTGAAATAATTTTGATC<br>CGAGTTAAGACCAATTATTGGTCTTTATAAATACCT<br>TAAGAATACATCAAAAAACATTTTTTTTAATAGGAA<br>AAAATAGTTACTTAAACTTTTAAATAAGCAAGAGTT<br>TTTGGTGGATGCTGGC           | F2-sense | 10 | 169 | 159 |
| Tortoise n. 18                  | TACGACATCAAATATATTTTGTGAAATAATTTTGAT<br>CCGAGTTAAGACCAATTATTGGTCTTTATAAATACC<br>TTAAGAATACATCAAAAAACATTTTTTTTAATAGGA<br>AAAAATAGTTACTTAAACTTTTAAATAAGCAAGAG<br>TTTTTGGTGGATGATGA           | F2-sense | 8  | 167 | 159 |
| Turtle n. 30                    | ATACGACATCAAATATATTTTGTGAAATAATTTTGA<br>TCCGAGTTGTGTCTATACATGGGTATAGACACTATA<br>AATACCTTAAGAATACATCAAACAAAAAACATT<br>TTTTTTAAATAGGAAAAATAGTTACTTATACTTTT<br>AAATAAGCAAGAGTTTTTGGTGGATGAAGA | F2-sense | 8  | 180 | 172 |
| <i>M. bovis</i> (Pos.<br>Ctrl.) | CACGACATCAAAAATCAAATTAATGGTTAATTTGTT<br>TTGATTCATCGAGTAAGTCATATTTAATATGATTCA<br>TTGAAATGTCTTAAAATACACATCTAAAATAACA<br>ACAATAGGAAAATACTACTTTTAAATAAGGAAGAG<br>TTTTTGGTGGATGCA               | F2-sense | 15 | 171 | 156 |
